# Supplementary material for: Physicians' prescribing preferences were a potential instrument for patients' actual prescriptions of antidepressants
Source: PubMed Central journal article supplement (PMC3824069; doi:10.1016/j.jclinepi.2013.06.008), 2013-12
Supplement: mmc1.pdf [file mmc1.pdf]

**eTable 1: Codes used to defined tricyclic antidepressants.**

| multilexcode | Product Name                                                            |
|--------------|-------------------------------------------------------------------------|
| 04425002     | perphenazine with amitriptyline tablets 2mg + 25mg                      |
| 04425001     | perphenazine with amitriptyline tablets 2mg + 10mg                      |
| 05296001     | amitriptyline hydrochloride with perphenazine tablets 10mg + 2mg        |
| 00982002     | TRIPTAFEN M tablets 2mg + 10mg [GOLDSHIELD]                             |
| 05296002     | amitriptyline hydrochloride with perphenazine tablets 25mg + 2mg        |
| 00982001     | TRIPTAFEN tablets 2mg + 25mg [GOLDSHIELD]                               |
| 16379001     | TRIPTAFEN M tablets 2mg + 10mg [GOLDSHIELD]                             |
| 01870001     | TRYPTIZOL injection 10mg/ml [M S D]                                     |
| 03075001     | amitriptyline hydrochloride injection 10mg/ml                           |
| 05295002     | amitriptyline hydrochloride with chlordiazepoxide capsules 25mg + 10mg  |
| 00527001     | LIMBITROL 5 capsules [ROCHE]                                            |
| 05295001     | amitriptyline hydrochloride with chlordiazepoxide capsules 12.5mg + 5mg |
| 01656001     | LIMBITROL 10 capsules [ROCHE]                                           |
| 05994003     | amoxapine tablets 100mg                                                 |
| 05994002     | amoxapine tablets 50mg                                                  |
| 05990002     | ASENDIS tablets 50mg [WYETH PHAR]                                       |
| 05995001     | amoxapine tablets 150mg                                                 |
| 05990001     | ASENDIS tablets 25mg [WYETH PHAR]                                       |
| 05991001     | ASENDIS tablets 150mg [WYETH PHAR]                                      |
| 05990003     | ASENDIS tablets 100mg [WYETH PHAR]                                      |
| 05994001     | amoxapine tablets 25mg                                                  |
| 05311001     | butriptyline tablets 25mg                                               |
| 01865001     | EVADYNE tablets 25mg [WYETH PHAR]                                       |
| 05311002     | butriptyline tablets 50mg                                               |
| 01855003     | ANAFRANIL capsules 50mg [NOVARTIS]                                      |
| 00702009     | CLOMIPRAMINE capsules 10mg [HILLCROSS]                                  |
| 03360001     | clomipramine syrup 25mg/5ml                                             |
| 02451009     | CLOMIPRAMINE capsules 10mg [IVAX]                                       |
| 02451010     | CLOMIPRAMINE capsules 25mg [IVAX]                                       |

**eTable 1: Codes used to defined tricyclic antidepressants.**

| multilexcode | Product Name                                 |
|--------------|----------------------------------------------|
| 16121001     | clomipramine oral suspension 50mg/5ml        |
| 03360002     | clomipramine injection 12.5mg/ml             |
| 01855002     | ANAFRANIL capsules 25mg [NOVARTIS]           |
| 01855001     | ANAFRANIL capsules 10mg [NOVARTIS]           |
| 01659009     | CLOMIPRAMINE capsules 10mg [TEVA]            |
| 03359001     | clomipramine capsules 10mg                   |
| 01857001     | ANAFRANIL SR tablets 75mg [NOVARTIS]         |
| 01856001     | ANAFRANIL syrup 25mg/5ml [NOVARTIS]          |
| 03362001     | ANAFRANIL injection 12.5mg/ml [NOV/GEIGY]    |
| 01659010     | CLOMIPRAMINE capsules 25mg [TEVA]            |
| 03359002     | clomipramine capsules 25mg                   |
| 00702011     | CLOMIPRAMINE capsules 50mg [HILLCROSS]       |
| 00702010     | CLOMIPRAMINE capsules 25mg [HILLCROSS]       |
| 03361001     | clomipramine modified release tablet 75mg    |
| 02451011     | CLOMIPRAMINE capsules 50mg [IVAX]            |
| 03359003     | clomipramine capsules 50mg                   |
| 11093002     | THADEN tablets 75mg [OPUS]                   |
| 02237010     | DOSULEPIN tablets 75mg [ACTAVIS]             |
| 03131009     | DOSULEPIN capsules 25mg [GEN (UK)]           |
| 01648010     | DOSULEPIN capsules 25mg [TEVA]               |
| 01648009     | DOSULEPIN tablets 75mg [TEVA]                |
| 03688003     | dosulepin sugar free elixir 25mg/5ml         |
| 02237009     | DOSULEPIN capsules 25mg [ACTAVIS]            |
| 00385010     | DOSULEPIN tablets 75mg [HILLCROSS]           |
| 11093001     | THADEN capsules 25mg [OPUS]                  |
| 03841009     | DOSULEPIN capsules 25mg [KENT]               |
| 02277001     | PREPADINE capsules 25mg [BERK]               |
| 02277002     | PREPADINE tablets 75mg [BERK]                |
| 01873001     | PROTHIADEN capsules 25mg [TEOFARMA]          |
| 17359001     | dosulepin sugar free oral solution 100mg/5ml |

**eTable 1: Codes used to defined tricyclic antidepressants.**

| multilexcode | Product Name                                          |
|--------------|-------------------------------------------------------|
| 01672001     | dosulepin sugar free elixir 75mg/5ml                  |
| 01436010     | DOSULEPIN capsules 25mg [IVAX]                        |
| 00385009     | DOSULEPIN capsules 25mg [HILLCROSS]                   |
| 04751009     | DOSULEPIN capsules 25mg [SANDOZ]                      |
| 02181002     | DOTHAPAX tablets 75mg [ASHBOURNE]                     |
| 01873002     | PROTHIADEN tablets 75mg [TEOFARMA]                    |
| 05198009     | DOSULEPIN capsules 25mg [ALMUS]                       |
| 03532009     | DOSULEPIN capsules 25mg [SOVEREIGN]                   |
| 03688002     | dosulepin tablets 75mg                                |
| 02181001     | DOTHAPAX capsules 25mg [ASHBOURNE]                    |
| 01436009     | DOSULEPIN tablets 75mg [IVAX]                         |
| 05199009     | DOSULEPIN tablets 75mg [ALMUS]                        |
| 03688001     | dosulepin capsules 25mg                               |
| 01672002     | dosulepin mixture 25mg/5ml                            |
| 03131010     | DOSULEPIN tablets 75mg [GEN (UK)]                     |
| 01876001     | SINEQUAN capsules 75mg [PFIZER]                       |
| 01875001     | SINEQUAN capsules 10mg [PFIZER]                       |
| 03692001     | doxepin capsules 75mg                                 |
| 01875002     | SINEQUAN capsules 25mg [PFIZER]                       |
| 14828001     | SINEPIN capsules 50mg [MARLBORO]                      |
| 03691003     | doxepin capsules 50mg                                 |
| 01875003     | SINEQUAN capsules 50mg [PFIZER]                       |
| 03691001     | doxepin capsules 10mg                                 |
| 03691002     | doxepin capsules 25mg                                 |
| 14827001     | SINEPIN capsules 25mg [MARLBORO]                      |
| 16793001     | doxepin oral suspension 25mg/5ml                      |
| 02365001     | MOTIVAL tablets [SANOFI S]                            |
| 02367001     | MOTIPRESS tablets 30mg + 1.5mg [SANOFI S]             |
| 05369002     | nortriptyline with fluphenazine tablets 30mg + 1.5mg  |
| 03500001     | fluphenazine with nortriptyline tablets 500mcg + 10mg |

**eTable 1: Codes used to defined tricyclic antidepressants.**

| multilexcode | Product Name                                                 |
|--------------|--------------------------------------------------------------|
| 05369001     | nortriptyline with fluphenazine tablets 10mg + 500micrograms |
| 03890002     | iprindole hydrochloride tablets 30mg                         |
| 03890001     | iprindole hydrochloride tablets 15mg                         |
| 03891002     | PRONDOL tablets 30mg [WYETH PHAR]                            |
| 03891001     | PRONDOL tablets 15mg [WYETH PHAR]                            |
| 10794001     | LOMONT sugar-free suspension 70mg/5ml [ROSEMONT]             |
| 02256009     | LOFEPRAMINE tablets 70mg [ACTAVIS]                           |
| 01922009     | LOFEPRAMINE sugar-free suspension 70mg/5ml [ROSEMONT]        |
| 02807009     | LOFEPRAMINE tablets 70mg [HILLCROSS]                         |
| 03036009     | LOFEPRAMINE tablets 70mg [STERWIN]                           |
| 02138009     | LOFEPRAMINE tablets 70mg [IVAX]                              |
| 04000001     | lofepramine tablets 70mg                                     |
| 02857009     | LOFEPRAMINE tablets 70mg [TEVA]                              |
| 04000002     | lofepramine sugar-free suspension 70mg/5ml                   |
| 01867001     | GAMANIL tablets 70mg [MERCK]                                 |
| 01851001     | LUDIOMIL tablets 10mg [NOV/CIBA]                             |
| 01851003     | LUDIOMIL tablets 50mg [NOV/CIBA]                             |
| 04072001     | maprotiline tablets 75mg                                     |
| 04071002     | maprotiline tablets 25mg                                     |
| 01851002     | LUDIOMIL tablets 25mg [NOV/CIBA]                             |
| 04071003     | maprotiline tablets 50mg                                     |
| 04071001     | maprotiline tablets 10mg                                     |
| 01852001     | LUDIOMIL tablets 75mg [NOV/CIBA]                             |
| 00117003     | BOLVIDON tablets 30mg [ORGANON]                              |
| 04190003     | mianserin tablets 30mg                                       |
| 04190002     | mianserin tablets 20mg                                       |
| 00117001     | BOLVIDON tablets 10mg [ORGANON]                              |
| 00661002     | NORVAL tablets 20mg [BENCARD]                                |
| 00117002     | BOLVIDON tablets 20mg [ORGANON]                              |
| 04190001     | mianserin tablets 10mg                                       |

**eTable 1: Codes used to defined tricyclic antidepressants.**

| multilexcode | Product Name                                        |
|--------------|-----------------------------------------------------|
| 00661003     | NORVAL tablets 30mg [BENCARD]                       |
| 00661001     | NORVAL tablets 10mg [BENCARD]                       |
| 03556010     | TRAZODONE capsules 100mg [WINTHROP]                 |
| 01687001     | MOLIPAXIN sugar free liquid 50mg/5ml [AVENTIS]      |
| 03577010     | TRAZODONE capsules 100mg [TEVA]                     |
| 03556009     | TRAZODONE capsules 50mg [WINTHROP]                  |
| 01513003     | MOLIPAXIN tablets 150mg [AVENTIS]                   |
| 03704010     | TRAZODONE capsules 100mg [GEN (UK)]                 |
| 04857003     | trazodone tablets 150mg                             |
| 04857002     | trazodone capsules 100mg                            |
| 03577009     | TRAZODONE capsules 50mg [TEVA]                      |
| 01513002     | MOLIPAXIN capsules 100mg [AVENTIS]                  |
| 04857001     | trazodone capsules 50mg                             |
| 03273010     | TRAZODONE capsules 100mg [HILLCROSS]                |
| 03273009     | TRAZODONE capsules 50mg [HILLCROSS]                 |
| 03704009     | TRAZODONE capsules 50mg [GEN (UK)]                  |
| 04858002     | trazodone modified release tablet 150mg             |
| 04858001     | trazodone sugar free oral solution 50mg/5ml         |
| 03704011     | TRAZODONE tablets 150mg [GEN (UK)]                  |
| 01687002     | MOLIPAXIN controlled release tablet 150mg [AVENTIS] |
| 03556011     | TRAZODONE tablets 150mg [WINTHROP]                  |
| 03577011     | TRAZODONE tablets 150mg [TEVA]                      |
| 01513001     | MOLIPAXIN capsules 50mg [AVENTIS]                   |
| 01863001     | SURMONTIL tablets 10mg [AVENTIS]                    |
| 04892001     | trimipramine maleate tablets 10mg                   |
| 06159009     | TRIMIPRAMINE tablets 25mg [HILLCROSS]               |
| 01863002     | SURMONTIL tablets 25mg [AVENTIS]                    |
| 04892002     | trimipramine maleate tablets 25mg                   |
| 04892003     | trimipramine maleate capsules 50mg                  |
| 06158009     | TRIMIPRAMINE tablets 10mg [HILLCROSS]               |

**eTable 1: Codes used to defined tricyclic antidepressants.**

| multilexcode | Product Name                                               |
|--------------|------------------------------------------------------------|
| 01863003     | SURMONTIL capsules 50mg [AVENTIS]                          |
| 04375001     | viloxazine hydrochloride tablets 50mg                      |
| 01040001     | VIVALAN tablets 50mg [ASTRAZENECA]                         |
| 03557001     | desipramine tablets 25mg                                   |
| 01853001     | PERTOFRAN tablets 25mg [NOV/GEIGY]                         |
| 02492001     | CONCORDIN 5 tablets [M S D]                                |
| 02494001     | CONCORDIN 10 tablets [M S D]                               |
| 04627001     | protriptyline tablets 5mg                                  |
| 04627002     | protriptyline tablets 10mg                                 |
| 01932010     | AMITRIPTYLINE sugar free oral solution 50mg/5ml [ROSEMONT] |
| 00134009     | AMITRIPTYLINE tablets 25mg [CROSS-PHAR]                    |
| 00136009     | AMITRIPTYLINE tablets 10mg [IVAX]                          |
| 05923009     | AMITRIPTYLINE tablets 25mg [ALMUS]                         |
| 01870002     | TRYPTIZOL MR capsules 75mg [M S D]                         |
| 01869001     | TRYPTIZOL tablets 10mg [M S D]                             |
| 00130010     | AMITRIPTYLINE tablets 50mg [BERK]                          |
| 02776003     | amitriptyline hydrochloride tablets 50mg                   |
| 00136010     | AMITRIPTYLINE tablets 25mg [IVAX]                          |
| 00128010     | AMITRIPTYLINE tablets 25mg [TEVA]                          |
| 00133009     | AMITRIPTYLINE tablets 10mg [ACTAVIS]                       |
| 00129011     | AMITRIPTYLINE tablets 50mg [WOCKHARDT]                     |
| 01849001     | DOMICAL tablets 10mg [BERK]                                |
| 00138009     | AMITRIPTYLINE tablets 10mg [SUSSEX]                        |
| 01861001     | LENTIZOL capsules 25mg [PFIZER]                            |
| 02819001     | ELAVIL tablets 10mg [DDSA]                                 |
| 03074001     | amitriptyline hydrochloride modified release capsules 25mg |
| 00131010     | AMITRIPTYLINE tablets 25mg [HILLCROSS]                     |
| 02776001     | amitriptyline hydrochloride tablets 10mg                   |
| 00128009     | AMITRIPTYLINE tablets 10mg [TEVA]                          |
| 00131009     | AMITRIPTYLINE tablets 10mg [HILLCROSS]                     |

**eTable 1: Codes used to defined tricyclic antidepressants.**

| multilexcode | Product Name                                                  |
|--------------|---------------------------------------------------------------|
| 00137009     | AMITRIPTYLINE tablets 25mg [REGENT]                           |
| 00129009     | AMITRIPTYLINE tablets 10mg [WOCKHARDT]                        |
| 00133010     | AMITRIPTYLINE tablets 25mg [ACTAVIS]                          |
| 00130009     | AMITRIPTYLINE tablets 10mg [BERK]                             |
| 03074002     | amitriptyline hydrochloride modified release capsules 50mg    |
| 00132010     | AMITRIPTYLINE tablets 25mg [CELLTECH]                         |
| 01932011     | AMITRIPTYLINE sugar free oral solution 10mg/5ml [ROSEMONT]    |
| 00135009     | AMITRIPTYLINE tablets 10mg [KENT]                             |
| 00131011     | AMITRIPTYLINE tablets 50mg [HILLCROSS]                        |
| 01849002     | DOMICAL tablets 25mg [BERK]                                   |
| 07191002     | amitriptyline hydrochloride sugar free oral solution 25mg/5ml |
| 01869002     | TRYPTIZOL tablets 25mg [M S D]                                |
| 01869003     | TRYPTIZOL tablets 50mg [M S D]                                |
| 00133011     | AMITRIPTYLINE tablets 50mg [ACTAVIS]                          |
| 01871001     | TRYPTIZOL sugar free mixture 10mg/5ml [M S D]                 |
| 00135010     | AMITRIPTYLINE tablets 25mg [KENT]                             |
| 01861002     | LENTIZOL capsules 50mg [PFIZER]                               |
| 02776002     | amitriptyline hydrochloride tablets 25mg                      |
| 07191003     | amitriptyline hydrochloride sugar free oral solution 10mg/5ml |
| 01849003     | DOMICAL tablets 50mg [BERK]                                   |
| 07191001     | amitriptyline hydrochloride sugar free oral solution 50mg/5ml |
| 00128011     | AMITRIPTYLINE tablets 50mg [TEVA]                             |
| 00129010     | AMITRIPTYLINE tablets 25mg [WOCKHARDT]                        |
| 00135011     | AMITRIPTYLINE tablets 50mg [KENT]                             |
| 01932009     | AMITRIPTYLINE sugar free oral solution 25mg/5ml [ROSEMONT]    |
| 03074003     | amitriptyline hydrochloride modified release capsules 75mg    |
| 00130011     | AMITRIPTYLINE tablets 25mg [BERK]                             |
| 00138010     | AMITRIPTYLINE tablets 25mg [SUSSEX]                           |
| 01845001     | AVENTYL capsules 10mg [LILLY]                                 |
| 04303002     | nortriptyline tablets 25mg                                    |

**eTable 1: Codes used to defined tricyclic antidepressants.**

| multilexcode | Product Name                        |
|--------------|-------------------------------------|
| 01847001     | ALLEGRON tablets 10mg [KING]        |
| 04303001     | nortriptyline tablets 10mg          |
| 01845002     | AVENTYL capsules 25mg [LILLY]       |
| 01847002     | ALLEGRON tablets 25mg [KING]        |
| 04304002     | nortriptyline capsules 25mg         |
| 04304001     | nortriptyline capsules 10mg         |
| 04304003     | nortriptyline liquid 10mg/5ml       |
| 01845003     | AVENTYL liquid 10mg/5ml [LILLY]     |
| 00443010     | IMIPRAMINE tablets 25mg [CP PHARM]  |
| 01859002     | TOFRANIL tablets 25mg [NOVARTIS]    |
| 01859003     | TOFRANIL syrup 25mg/5ml [NOVARTIS]  |
| 01859001     | TOFRANIL tablets 10mg [NOVARTIS]    |
| 00445009     | IMIPRAMINE tablets 10mg [HILLCROSS] |
| 01850009     | IMIPRAMINE tablets 25mg [TEVA]      |
| 00444009     | IMIPRAMINE tablets 10mg [ACTAVIS]   |
| 00444010     | IMIPRAMINE tablets 25mg [ACTAVIS]   |
| 02908001     | PRAMINIL tablets 10mg [DDSA]        |
| 02887002     | imipramine tablets 25mg             |
| 02887001     | imipramine tablets 10mg             |
| 00445010     | IMIPRAMINE tablets 25mg [HILLCROSS] |
| 03869001     | imipramine syrup 25mg/5ml           |
| 05316009     | IMIPRAMINE tablets 10mg [TEVA]      |
| 17567001     | imipramine oral solution 25mg/5ml   |



**eTable 2: Codes used to defined selective serotonin reuptake inhibitor prescriptions (except paroxetine).**

| multilexcode | Product Name                           |
|--------------|----------------------------------------|
| 14029001     | CIPRALEX oral drops 10mg/ml [LUNDBECK] |
| 17209001     | CIPRALEX oral drops 20mg/ml [LUNDBECK] |
| 11714001     | CIPRALEX tablets 10mg [LUNDBECK]       |
| 01911001     | CIPRALEX tablets 20mg [LUNDBECK]       |
| 12337001     | CIPRALEX tablets 5mg [LUNDBECK]        |
| 07827001     | CIPRAMIL oral drops 40mg/ml [LUNDBECK] |
| 08604002     | CIPRAMIL tablets 10mg [LUNDBECK]       |
| 08604001     | CIPRAMIL tablets 20mg [LUNDBECK]       |
| 08604003     | CIPRAMIL tablets 40mg [LUNDBECK]       |
| 07825001     | citalopram oral drops 40mg/ml          |
| 08619002     | citalopram tablets 10mg                |
| 05061009     | CITALOPRAM tablets 10mg [ACTAVIS]      |
| 06051009     | CITALOPRAM tablets 10mg [ALMUS]        |
| 04664009     | CITALOPRAM tablets 10mg [GEN (UK)]     |
| 04366009     | CITALOPRAM tablets 10mg [HILLCROSS]    |
| 06005009     | CITALOPRAM tablets 10mg [IVAX]         |
| 04331009     | CITALOPRAM tablets 10mg [NEOLAB]       |
| 04294009     | CITALOPRAM tablets 10mg [SANDOZ]       |
| 04578009     | CITALOPRAM tablets 10mg [STERWIN]      |
| 05104009     | CITALOPRAM tablets 10mg [TEVA]         |
| 08619001     | citalopram tablets 20mg                |
| 05062009     | CITALOPRAM tablets 20mg [ACTAVIS]      |
| 04665009     | CITALOPRAM tablets 20mg [GEN (UK)]     |
| 04367009     | CITALOPRAM tablets 20mg [HILLCROSS]    |
| 04332009     | CITALOPRAM tablets 20mg [NEOLAB]       |
| 04729009     | CITALOPRAM tablets 20mg [NICHE]        |
| 04295009     | CITALOPRAM tablets 20mg [SANDOZ]       |

---

04579009 CITALOPRAM tablets 20mg [STERWIN]

05105009 CITALOPRAM tablets 20mg [TEVA]

---

**eTable 2: Codes used to defined selective serotonin reuptake inhibitor prescriptions (except paroxetine (cont.)).**

---

08619003 citalopram tablets 40mg

04666009 CITALOPRAM tablets 40mg [GEN (UK)]

04368009 CITALOPRAM tablets 40mg [HILLCROSS]

04296009 CITALOPRAM tablets 40mg [SANDOZ]

14028001 escitalopram oral drops 10mg/ml

17208001 escitalopram oral drops 20mg/ml

08328001 escitalopram tablets 10mg

01438001 escitalopram tablets 20mg

12336001 escitalopram tablets 5mg

03507002 FAVERIN tablets 100mg [SOLVAY]

03507001 FAVERIN tablets 50mg [SOLVAY]

00407001 FELICIUM capsules 20mg [OPUS]

05552001 fluoxetine capsules 20mg

03345009 FLUOXETINE capsules 20mg [GEN (UK)]

03356009 FLUOXETINE capsules 20mg [GENUS]

03270009 FLUOXETINE capsules 20mg [HILLCROSS]

03290009 FLUOXETINE capsules 20mg [IVAX]

06933009 FLUOXETINE capsules 20mg [MILPHARM]

03348009 FLUOXETINE capsules 20mg [NICHE]

03727009 FLUOXETINE capsules 20mg [RANBAXY]

03325009 FLUOXETINE capsules 20mg [TEVA]

04611009 FLUOXETINE capsules 20mg [TILLOMED]

03393009 FLUOXETINE capsules 20mg [WINTHROP]

05552003 fluoxetine capsules 60mg

04389009 FLUOXETINE capsules 60mg [GEN (UK)]

05552002 fluoxetine oral solution 20mg/5ml

04186009 FLUOXETINE oral solution 20mg/5ml [HILLCROSS]

04573009 FLUOXETINE oral solution 20mg/5ml [IVAX]

---

---

|          |                                              |
|----------|----------------------------------------------|
| 15596001 | fluoxetine sugar free oral solution 20mg/5ml |
| 04179009 | FLUOXETINE syrup 20mg/5ml [TEVA]             |

---

**eTable 2: Codes used to defined selective serotonin reuptake inhibitor prescriptions (except paroxetine (cont.)).**

---

|          |                                          |
|----------|------------------------------------------|
| 03506002 | fluvoxamine tablets 100mg                |
| 03506001 | fluvoxamine tablets 50mg                 |
| 06825002 | LUSTRAL tablets 100mg [PFIZER]           |
| 06825001 | LUSTRAL tablets 50mg [PFIZER]            |
| 09185001 | OXACTIN capsules 20mg [DISCOVERY]        |
| 12748001 | PAXORAN tablets 10mg [RANBAXY]           |
| 12749001 | PAXORAN tablets 20mg [RANBAXY]           |
| 05509001 | PROZAC capsules 20mg [LILLY]             |
| 05509003 | PROZAC capsules 60mg [LILLY]             |
| 05509002 | PROZAC liquid 20mg/5ml [LILLY]           |
| 15563001 | PROZEP oral solution 20mg/5ml [CHEMIDEX] |
| 09233001 | PROZIT oral solution 20mg/5ml [PINWOOD]  |
| 09840001 | RANFLUTIN capsules 20mg [RANBAXY]        |
| 06826002 | sertraline tablets 100mg                 |
| 06826001 | sertraline tablets 50mg                  |
| 06250009 | SERTRALINE tablets 50mg [ACTAVIS]        |
| 06156009 | SERTRALINE tablets 50mg [HILLCROSS]      |
| 17632001 | fluoxetine tablets 10mg                  |
| 13840001 | sertraline oral suspension 50mg/5ml      |

---

**eTable 3: Codes used to defined paroxetine prescriptions**

| multilexcode | Product Name                                         |
|--------------|------------------------------------------------------|
| 06509003     | paroxetine sugar-free suspension 20mg/10ml           |
| 14617001     | paroxetine tablets 10mg                              |
| 06509001     | paroxetine tablets 20mg                              |
| 04421009     | PAROXETINE tablets 20mg [ACTAVIS]                    |
| 04649009     | PAROXETINE tablets 20mg [GEN (UK)]                   |
| 05579009     | PAROXETINE tablets 20mg [GENUS]                      |
| 04667009     | PAROXETINE tablets 20mg [HILLCROSS]                  |
| 03912009     | PAROXETINE tablets 20mg [IVAX]                       |
| 06509002     | paroxetine tablets 30mg                              |
| 04971009     | PAROXETINE tablets 30mg [ACTAVIS]                    |
| 04992009     | PAROXETINE tablets 30mg [HILLCROSS]                  |
| 06510003     | SEROXAT sugar-free suspension 20mg/10ml [GLAXSK PHA] |
| 15192001     | SEROXAT tablets 10mg [GLAXSK PHA]                    |
| 06510001     | SEROXAT tablets 20mg [GLAXSK PHA]                    |
| 06510002     | SEROXAT tablets 30mg [GLAXSK PHA]                    |

**etable 4: Association of actual prescription with physicians' previous prescription, a count of the physicians' previous three prescriptions and indicators for the physicians' previous seven prescriptions, adjusted for year of first prescription. TCAs vs. SSRIs.**

| Instrument:                                | TCAs vs. SSRIs                                                         |       |                                                                                   |       |                                                                                         |       |
|--------------------------------------------|------------------------------------------------------------------------|-------|-----------------------------------------------------------------------------------|-------|-----------------------------------------------------------------------------------------|-------|
|                                            | One prior prescription<br>Risk difference<br>(95% confidence interval) |       | Count of three prior prescription<br>Risk difference<br>(95% confidence interval) |       | Indicators for seven prior prescription<br>Risk difference<br>(95% confidence interval) |       |
| Prior prescription                         | 14.90 (14.42,15.38)                                                    |       |                                                                                   |       |                                                                                         |       |
| 1 prior prescription                       |                                                                        |       | 10.90 (10.43,11.37)                                                               |       | 9.07 (8.82,9.33)                                                                        |       |
| 2 prior prescriptions                      |                                                                        |       | 21.35 (20.71,21.98)                                                               |       | 7.61 (7.35,7.86)                                                                        |       |
| 3 prior prescriptions                      |                                                                        |       | 32.60 (31.77,33.44)                                                               |       | 7.25 (7.01,7.49)                                                                        |       |
| 4 prior prescriptions                      |                                                                        |       |                                                                                   |       | 6.71 (6.45,6.96)                                                                        |       |
| 5 prior prescriptions                      |                                                                        |       |                                                                                   |       | 6.91 (6.66,7.17)                                                                        |       |
| 6 prior prescriptions                      |                                                                        |       |                                                                                   |       | 6.82 (6.56,7.07)                                                                        |       |
| 7 prior prescriptions                      |                                                                        |       |                                                                                   |       | 6.68 (6.42,6.94)                                                                        |       |
| N                                          | 886,735                                                                |       | 886,735                                                                           |       | 847,405                                                                                 |       |
| Number of physicians                       | 6,555                                                                  |       | 6,555                                                                             |       | 6,555                                                                                   |       |
| Standard error on prescription coefficient | 0.14                                                                   |       | 0.10                                                                              |       | 0.09                                                                                    |       |
| F-Test                                     | F(1,6554)                                                              | 3,663 | F(3,552)                                                                          | 1,971 | F(7,6548)                                                                               | 1,469 |
| Partial r <sup>2</sup>                     | 0.02                                                                   |       | 0.05                                                                              |       | 0.07                                                                                    |       |

Notes: SSRI=Selective serotonin reuptake inhibitors, TCA=tricyclic antidepressant. All confidence intervals robust for heteroskedasticity and clustered by physician. Risk difference is difference in probability of tricyclic antidepressant or paroxetine actually being prescribed if physician previously prescribed a paroxetine or tricyclic antidepressant. E.g. In row 1, column 1, if the physician previously prescribed a tricyclic antidepressant, their current patient is 15% more likely to also be prescribed a tricyclic antidepressant than a selective serotonin reuptake inhibitor. There are fewer observations in the final column because some patients' physicians had issued fewer than seven previous SSRI or TCA prescriptions.

**etable 5: Association of actual prescription with physicians' previous prescription, a count of the physicians' previous three prescriptions and indicators for the physicians' previous seven prescriptions, adjusted for year of first prescription. Paroxetine vs. SSRIs.**

|                                     | Paroxetine vs. SSRIs      |       |                                   |       |                                         |       |
|-------------------------------------|---------------------------|-------|-----------------------------------|-------|-----------------------------------------|-------|
|                                     | One prior prescription    |       | Count of three prior prescription |       | Indicators for seven prior prescription |       |
| Instrument:                         | Risk difference           |       | Risk difference                   |       | Risk difference                         |       |
|                                     | (95% confidence interval) |       | (95% confidence interval)         |       | (95% confidence interval)               |       |
| Prior prescription                  | 27.72 (26.69,28.76)       |       |                                   |       |                                         |       |
| 1 prior prescription                |                           |       | 12.67 (12.16,13.18)               |       | 15.01 (14.43,15.59)                     |       |
| 2 prior prescriptions               |                           |       | 31.77 (30.76,32.78)               |       | 11.19 (10.65,11.73)                     |       |
| 3 prior prescriptions               |                           |       | 54.58 (53.15,56.02)               |       | 10.03 (9.50,10.55)                      |       |
| 4 prior prescriptions               |                           |       |                                   |       | 7.67 (7.14,8.21)                        |       |
| 5 prior prescriptions               |                           |       |                                   |       | 7.12 (6.61,7.63)                        |       |
| 6 prior prescriptions               |                           |       |                                   |       | 6.70 (6.21,7.20)                        |       |
| 7 prior prescriptions               |                           |       |                                   |       | 6.53 (6.05,7.02)                        |       |
| N                                   | 390,600                   |       | 390,600                           |       | 359,736                                 |       |
| Number of physicians                | 5,144                     |       | 5,144                             |       | 5,144                                   |       |
| Standard error on prescription coef | 0.20                      |       | 0.15                              |       | 0.14                                    |       |
| F-Test                              | F(1,5143)                 | 2,770 | F(3,5143)                         | 2,582 | F(7,5143)                               | 1,429 |
| Partial r <sup>2</sup>              | 0.08                      |       | 0.13                              |       | 0.16                                    |       |

Notes: SSRI=Selective serotonin reuptake inhibitors. All confidence intervals robust for heteroskedasticity and clustered by physician. Risk difference is difference in probability of SSRI or paroxetine actually being prescribed if physician previously prescribed a paroxetine or other SSRI. E.g. In row 1, column 1, if the physician previously prescribed paroxetine, their current patient is 28% more likely to also be prescribed paroxetine than another selective serotonin reuptake inhibitor. There are fewer observations in the final column because some patients' physicians had issued fewer than seven previous SSRI prescriptions.

**Table 6: Association of covariates with actual prescription, and physicians' previous prescriptions, a count of the physicians' previous three prescriptions and indicators for the physicians' previous seven prescriptions, adjusted for year of first prescription. TCAs vs. SSRIs vs. (N=886,735)**

|                                           | Actual prescription<br>TCAs vs.SSRIs<br>F-stat | Physicians' prior<br>prescription<br>F-stat | Count of three<br>previous prescription<br>F-stat | Indicators for physicians'<br>seven previous<br>prescriptions<br>F-stat |
|-------------------------------------------|------------------------------------------------|---------------------------------------------|---------------------------------------------------|-------------------------------------------------------------------------|
| Body Mass Index > 25 (N=679,755)          | 2360.89                                        | 45.13                                       | 34.05                                             | 15.00                                                                   |
| Hospitalized in prior year                | 6.72                                           | 0.38                                        | 1.49                                              | 1.55                                                                    |
| Consultations in prior year>13            | 8423.57                                        | 104.19                                      | 49.79                                             | 12.38                                                                   |
| Age at first prescription >40             | 12106.78                                       | 310.92                                      | 136.68                                            | 48.90                                                                   |
| Prescription in prior year>5              | 14113.39                                       | 252.04                                      | 112.03                                            | 35.75                                                                   |
| Male*                                     | 122.27                                         | 10.29                                       | 7.53                                              | 5.70                                                                    |
| Ever smoked                               | 2741.45                                        | 161.24                                      | 73.88                                             | 27.80                                                                   |
| Diagnosed depressed prior to prescription | 3758.00                                        | 149.73                                      | 57.00                                             | 23.44                                                                   |
| Prior diagnosis definite self-harm        | 0.55                                           | 9.29                                        | 3.23                                              | 1.82                                                                    |
| Prior hypnotic prescription               | 983.04                                         | 36.23                                       | 20.83                                             | 10.08                                                                   |
| Prior anti-psychotic prescription         | 95.03                                          | 1.87                                        | 1.38                                              | 0.16                                                                    |
| Prior Charlson Index not zero             | 3231.43                                        | 79.34                                       | 50.53                                             | 14.24                                                                   |
| Percent prescribed before 2004            | 169.77                                         | 176.17                                      | 90.00                                             | NA                                                                      |

Notes: SSRI=Selective serotonin reuptake inhibitors, TCA=tricyclic antidepressant. All F-statistics calculated with robust standard errors clustered by physician. The sample for the seven previous prescriptions was 847,405. The null hypothesis of the F-test is that the coefficient(s) on the prescription or previous prescription was (were jointly) equal to zero.

**Table 7: Association of covariates with actual prescription, and physicians' previous prescriptions, a count of the physicians' previous three prescriptions and indicators for the physicians' previous seven prescriptions, adjusted for year of first prescription. Paroxetine vs. SSRIs. (N=390,600)**

|                                           | Actual prescription<br>Paroxetine vs.<br>F-stat | Physicians' prior<br>prescription<br>F-stat | Count of<br>previous<br>prescriptions<br>F-stat | Indicators for physicians'<br>seven previous<br>prescriptions<br>F-stat |
|-------------------------------------------|-------------------------------------------------|---------------------------------------------|-------------------------------------------------|-------------------------------------------------------------------------|
| Body Mass Index > 25 (N=290,301)          | 7.23                                            | 2.88                                        | 1.29                                            | 0.51                                                                    |
| Hospitalized in prior year                | 0.03                                            | 0.63                                        | 2.50                                            | 1.57                                                                    |
| More than 13 Consultations in prior year  | 40.96                                           | 0.62                                        | 2.62                                            | 0.81                                                                    |
| Older than 40 at first prescriptions      | 0.93                                            | 0.04                                        | 0.46                                            | 0.49                                                                    |
| More than 5 prescriptions in prior year   | 36.11                                           | 0.23                                        | 0.51                                            | 1.00                                                                    |
| Male*                                     | 129.61                                          | 2.61                                        | 6.89                                            | 1.50                                                                    |
| Ever smoked                               | 1.40                                            | 0.66                                        | 1.00                                            | 1.86                                                                    |
| Diagnosed depressed prior to prescription | 82.80                                           | 0.82                                        | 7.73                                            | 1.02                                                                    |
| Prior diagnosis definite self-harm        | 4.73                                            | 3.92                                        | 2.45                                            | 1.69                                                                    |
| Prior hypnotic prescriptions              | 0.88                                            | 1.45                                        | 3.11                                            | 1.42                                                                    |
| Prior anti-psychotic prescriptions        | 45.91                                           | 0.004                                       | 5.36                                            | 0.12                                                                    |
| Prior Charlson Index not zero             | 17.70                                           | 2.17                                        | 0.52                                            | 1.05                                                                    |
| Percent prescribed before 2004            | 11963.87                                        | 11974.89                                    | 5141.24                                         | NA                                                                      |

Notes: SSRI=Selective serotonin reuptake inhibitors. All F-statistics calculated with robust standard errors clustered by physician. The sample for the seven previous prescriptions was 359,736. The null hypothesis of the F-test is that the coefficient(s) on the prescription or previous prescription was (were jointly) equal to zero.
